## Prophylactic antiemetic therapy with a combination of granisetron and dexamethasone in patients undergoing middle ear surgery

Y. FUJII, H. TOYOOKA AND H. TANAKA

### Summary

We have compared the efficacy of granisetron in combination with dexamethasone with each drug alone in the prevention of postoperative nausea and vomiting (PONV) after middle ear surgery. In a randomized, double-blind study, 120 patients (85 females) received granisetron 3 mg, dexamethasone 8 mg or granisetron 3 mg with dexamethasone 8 mg i.v. ( $n=40$  in each group), immediately before induction of anaesthesia. A standardized general anaesthetic technique was used. A complete response, defined as no PONV and no need for another rescue antiemetic during the first 3 h after anaesthesia, was recorded in 83%, 50% and 98% of patients who had received granisetron, dexamethasone and granisetron–dexamethasone, respectively. The corresponding incidences during the next 21 h after anaesthesia were 80%, 55% and 98% ( $P<0.05$ ; overall Fisher's exact probability test). In summary, prophylactic use of combined granisetron and dexamethasone was more effective than each antiemetic alone for the prevention of PONV after middle ear surgery. (*Br. J. Anaesth.* 1998; 81: 754–756).

Keywords: vomiting, nausea; vomiting, antiemetics, granisetron; vomiting, antiemetics, dexamethasone; surgery, otolaryngological

Postoperative nausea and vomiting (PONV) occur frequently after middle ear surgery, with incidences as high as 80% when no prophylactic antiemetic is given.<sup>1–3</sup> We have demonstrated recently that granisetron, a selective 5-hydroxytryptamine type 3 (5-HT<sub>3</sub>) receptor antagonist, reduces the incidence of PONV in patients undergoing general anaesthesia for middle ear surgery.<sup>4</sup> However, this antiemetic cannot entirely control PONV after middle ear surgery. Dexamethasone has been used as an antiemetic in patients receiving chemotherapy, with limited side effects,<sup>5</sup> and has also been reported to decrease chemotherapy-induced emesis when added to an antiemetic regimen.<sup>6</sup> In this study, we have compared the efficacy of granisetron with dexamethasone with each antiemetic alone for the prevention of PONV in patients undergoing middle ear surgery.

### Patients and methods

After obtaining approval from the Institutional Review Board and informed consent, we studied 120 ASA I patients (85 females), aged 25–60 yr, under-

going middle ear surgery (tympanoplasty or mastoidectomy). Patients with gastrointestinal diseases, those who had received any antiemetic medication within 24 h before surgery, and those who were pregnant or menstruating were excluded.

Patients were allocated randomly to receive one of three treatment regimens ( $n=40$  each): granisetron 3 mg, dexamethasone 8 mg or granisetron 3 mg with dexamethasone 8 mg. The drugs were administered i.v. immediately before induction of anaesthesia. A randomization list was prepared by a random number function in a computer spreadsheet and identical syringes containing each drug were prepared by personnel not involved in the study.

Patients received no preanaesthetic medication. Anaesthesia was induced with thiopental 5 mg kg<sup>-1</sup> and fentanyl 2 µg kg<sup>-1</sup> i.v., and vecuronium 0.2 mg kg<sup>-1</sup> i.v. was used to facilitate tracheal intubation. Anaesthesia was maintained with 1.0–3.0% isoflurane (inspired concentration) and 66% nitrous oxide (which was replaced by air before closing the tympanic membrane) in oxygen. Ventilation was controlled mechanically and adjusted to maintain end-tidal carbon dioxide concentration at 4.6–5.2 kPa throughout surgery using an anaesthetic–respiratory analyser (Ultima, Datex, Helsinki, Finland). Patients were not given opioids during surgery. A nasogastric tube was inserted and suction applied to empty the stomach of air and other contents. Before tracheal extubation, the nasogastric tube was again suctioned and removed. Neuromuscular block was achieved with vecuronium and antagonized by atropine 0.02 mg kg<sup>-1</sup> i.v. and neostigmine 0.04 mg kg<sup>-1</sup> i.v. at the end of surgery. The trachea was extubated when the patient was awake. Rectal temperature was monitored and maintained at 37±1°C throughout surgery. If two or more episodes of vomiting occurred during the first 24 h after anaesthesia, rescue antiemetic (e.g. metoclopramide 0.2 mg kg<sup>-1</sup>) was given. After operation, patients received indomethacin 50 mg rectally if they complained of moderate to severe pain.

During the first 24 h after anaesthesia (i.e. 0–3 h in the post-anaesthetic unit and 3–24 h on the ward), all episodes of PONV (nausea, retching, vomiting) were recorded every 3 h by blinded nursing staff. The nurses asked the patients if retching or vomiting had

YOSHITAKA FUJII, MD, HIDENORI TOYOOKA, MD, Department of Anaesthesiology, University of Tsukuba Institute of Clinical Medicine, 2–1–1, Amakubo, Tsukuba City, Ibaraki 305, Japan. HIROYOSHI TANAKA, MD, Department of Anaesthesiology, Toride Kyodo General Hospital, Toride City, Ibaraki, Japan. Accepted for publication: June 22, 1998.

Correspondence to Y. F.

Table 1 Patient characteristics (mean (SD or range) or number). Combination = Granisetron with dexamethasone. No significant differences

|                                       | Granisetron<br>(n = 40) | Dexamethasone<br>(n = 40) | Combination<br>(n = 40) |
|---------------------------------------|-------------------------|---------------------------|-------------------------|
| Age (yr)                              | 45 (25–60)              | 42 (25–60)                | 44 (25–60)              |
| Sex (F/M)                             | 29/11                   | 28/12                     | 28/12                   |
| Height (cm)                           | 158 (8)                 | 159 (8)                   | 158 (7)                 |
| Weight (kg)                           | 56 (8)                  | 56 (8)                    | 58 (8)                  |
| History of motion sickness (n)        | 3                       | 3                         | 3                       |
| History of previous PONV (n)          | 2                       | 2                         | 2                       |
| Duration of operation (min)           | 217 (40)                | 214 (42)                  | 218 (39)                |
| Duration of anaesthesia (min)         | 247 (40)                | 243 (44)                  | 247 (41)                |
| Indomethacin used after operation (n) | 22                      | 23                        | 22                      |
| Types of operation performed (n)      |                         |                           |                         |
| Tympantoplasty                        | 30                      | 30                        | 29                      |
| Mastoidectomy                         | 10                      | 10                        | 11                      |

occurred and if they felt nauseated, with only two possible answers (yes/no). Nausea was defined as the unpleasant sensation associated with awareness of the urge to vomit; retching was defined as laboured, spasmodic, rhythmic contraction of the respiratory muscles without expulsion of gastric contents; and vomiting was defined as the forceful expulsion of gastric contents from the mouth.<sup>7</sup> A complete response was defined as no PONV and no need for rescue antiemetic medication. Details of adverse events throughout the study were recorded by follow-up nurses who asked patients general questions and also recorded spontaneous complaints.

Statistical analysis was by ANOVA with Bonferroni correction for multiple comparison, chi-square test or Fisher's exact probability test, as appropriate (Stat View 4.0; Macintosh).  $P < 0.05$  was considered significant. All values are expressed as mean (SD, range) or number (%). We set  $\alpha = 0.05$  and  $\beta = 0.2$ , and used a large magnitude of effects (effective size 0.8) to estimate a sufficient sample size. The analysis showed that 40 patients per treatment group would be sufficient.

## Results

Patient characteristics and surgical procedures were similar in each group (table 1).

A complete response during the first 3 h (0–3 h) after anaesthesia was recorded in 83%, 50% and 98% of patients who had received granisetron, dexamethasone and granisetron–dexamethasone, respectively. The incidences during the next 21 h (3–24 h) after anaesthesia were 80%, 55% and 98%, respectively. Thus a complete response within the first 24 h after anaesthesia was achieved significantly more often in patients who had received a combination of granisetron and dexamethasone than in those who had received granisetron or dexamethasone alone (table 2).

The most frequently reported adverse events were headache and dizziness, but there were no differences between groups (table 3).

## Discussion

Postoperative nausea and vomiting (PONV) are among the most common complications after anaesthesia and surgery, with a relatively high incidence

after middle ear surgery (tympantoplasty or mastoidectomy).<sup>1,3</sup> Our previous study found that the incidence of PONV was as high as 60% in patients undergoing general anaesthesia for middle ear surgery.<sup>4,8</sup> This incidence may justify the use of prophylactic antiemetics for the prevention of PONV after middle ear surgery.

The aetiology of PONV after middle ear surgery performed under general anaesthesia is not known, but is probably multifactorial.<sup>7</sup> Several factors, including age, sex, obesity, history of motion sickness and/or previous PONV, menstruation, surgical procedure, anaesthetic technique and postoperative pain are considered to affect the incidence of PONV. In this study, however, these factors were well balanced between groups. An increased middle ear pressure by nitrous oxide is also one of the surgical factors contributing to PONV.<sup>3</sup> As middle ear pressure was measured in this study, no pressure was generated in the middle ear from diffusion of nitrous oxide, which was replaced by air before closing the tympanic membrane. Therefore, the difference in complete response between the groups may be attributed to differences in the antiemetic drugs administered.

We have demonstrated recently that granisetron 40  $\mu\text{g kg}^{-1}$  reduced the incidence of PONV in patients undergoing middle ear surgery,<sup>3</sup> and also that the efficacy of granisetron 40  $\mu\text{g kg}^{-1}$  was similar to that of granisetron 100  $\mu\text{g kg}^{-1}$  for the prevention of PONV in this population.<sup>8</sup> The dose chosen for this study was 3 mg (approximately 55  $\mu\text{g kg}^{-1}$ ). It has been reported that dexamethasone 8 mg decreased chemotherapy-induced emesis when added to an antiemetic regimen.<sup>6</sup> Therefore, in this study, the same dose of dexamethasone was added to granisetron 3 mg.

The precise mechanism of action of granisetron–dexamethasone in the augmentation of a complete response remains unclear, but granisetron antagonizes 5-HT<sub>3</sub> receptors in sites associated with antiemetic activity<sup>9</sup> and dexamethasone may also inhibit stimulation of 5-HT<sub>3</sub> receptors.<sup>10</sup> Dexamethasone did not increase the incidence of adverse events when added to granisetron.

We conclude that prophylactic therapy with a combination of granisetron and dexamethasone was more effective than each antiemetic alone for the prevention of PONV after middle ear surgery. This suggests that dexamethasone may be used as a

Table 2 Number (%) of patients with a complete response (no PONV, no rescue) and incidence of nausea, retching, vomiting and rescue antiemetic during the first 3 h (0–3 h) and the next 21 h (3–21 h) after anaesthesia. Combination = granisetron with dexamethasone;  $P_1$  values = granisetron vs dexamethasone;  $P_2$  values = granisetron vs combination; and  $P_3$  values = dexamethasone vs combination

|                                        | Granisetron<br>(n = 40) | Dexamethasone<br>(n = 40) | Combination<br>(n = 40) | $P_1$ | $P_2$ | $P_3$ |
|----------------------------------------|-------------------------|---------------------------|-------------------------|-------|-------|-------|
| 0–3 h after anaesthesia                |                         |                           |                         |       |       |       |
| Complete response (no PONV, no rescue) | 33(83%)                 | 20(50%)                   | 39(98%)                 | 0.002 | 0.028 | 0.001 |
| Nausea                                 | 4(10%)                  | 10(25%)                   | 1(3%)                   | 0.069 | 0.179 | 0.003 |
| Retching                               | 1(3%)                   | 2(5%)                     | 0(0%)                   | 0.5   | 0.5   | 0.247 |
| Vomiting                               | 3(8%)                   | 10(25%)                   | 1(3%)                   | 0.033 | 0.308 | 0.003 |
| Rescue                                 | 0(0%)                   | 5(13%)                    | 0(0%)                   | 0.027 | 1.0   | 0.027 |
| 3–24 h after anaesthesia               |                         |                           |                         |       |       |       |
| Complete response (no PONV, no rescue) | 32(80%)                 | 22(55%)                   | 39(98%)                 | 0.015 | 0.014 | 0.001 |
| Nausea                                 | 4(10%)                  | 9(23%)                    | 1(3%)                   | 0.112 | 0.179 | 0.007 |
| Retching                               | 2(5%)                   | 2(5%)                     | 0(0%)                   | 1.0   | 0.247 | 0.247 |
| Vomiting                               | 3(8%)                   | 9(23%)                    | 1(3%)                   | 0.057 | 0.308 | 0.007 |
| Rescue                                 | 0(0%)                   | 5(13%)                    | 0(0%)                   | 0.027 | 1.0   | 0.027 |

Table 3 Adverse events (number (%)). No significant differences

|                                    | Granisetron<br>(n = 40) | Dexamethasone<br>(n = 40) | Combination<br>(n = 40) |
|------------------------------------|-------------------------|---------------------------|-------------------------|
| 0–3 h after anaesthesia            |                         |                           |                         |
| Headache                           | 3(8%)                   | 3(8%)                     | 3(8%)                   |
| Dizziness                          | 2(5%)                   | 2(5%)                     | 2(5%)                   |
| Others(constipation, muscle pain)  | 2(5%)                   | 1(3%)                     | 2(5%)                   |
| 3–24 h after anaesthesia           |                         |                           |                         |
| Headache                           | 3(8%)                   | 3(8%)                     | 3(8%)                   |
| Dizziness                          | 2(5%)                   | 2(5%)                     | 2(5%)                   |
| Others (constipation, muscle pain) | 1(3%)                   | 1(3%)                     | 1(3%)                   |

component of combined prophylaxis for the control of PONV in patients undergoing other surgical procedures.

## References

- Honkavaara P, Saarivaara L, Klemola U-K. Prevention of nausea and vomiting with transdermal hyoscine in adults after middle ear surgery during general anaesthesia. *British Journal of Anaesthesia* 1994; **73**: 763–766.
- Honkavaara P. Effect of ondansetron on nausea and vomiting after middle ear surgery during general anaesthesia. *British Journal of Anaesthesia* 1996; **76**: 316–318.
- Reinhart DJ, Klein KW, Schroff E. Transdermal scopolamine for the reduction of postoperative nausea in outpatient ear surgery: a double-blind, randomized study. *Anesthesia and Analgesia* 1994; **79**: 281–284.
- Fujii Y, Toyooka H, Tanaka H. Granisetron reduces the incidence of nausea and vomiting following middle ear surgery. *British Journal of Anaesthesia* 1997; **79**: 539–540.
- Aapro MS, Alberts DS. Dexamethasone as an antiemetic in patients treated with cisplatin. *New England Journal of Medicine* 1981; **305**: 520.
- Smith DB, Newlands ES, Rustin GJS, Begent RHJ, Howells N, McQuade B, Bagshawe KD. Comparison of ondansetron and ondansetron plus dexamethasone as antiemetic prophylaxis during cisplatin containing chemotherapy. *Lancet* 1991; **338**: 487–490.
- Watcha MF, White PF. Postoperative nausea and vomiting. Its etiology, treatment, and prevention. *Anesthesiology* 1992; **77**: 162–184.
- Fujii Y, Toyooka H, Tanaka H. Granisetron in the prevention of nausea and vomiting following middle ear surgery: a dose ranging study. *British Journal of Anaesthesia* 1998; **81**: (in press).
- Carmichael J, Cantwell BM, Edwards CM, Zussmann BD, Thompson S, Rapeport WG, Harris AL. A pharmacokinetic study of granisetron (BRL 43694A), a selective 5-HT<sub>3</sub> receptor antagonist: correlation with anti-emetic response. *Cancer Chemotherapy and Pharmacology* 1989; **24**: 45–49.
- Aapro BMJ, Plezia PM, Alberts DS, Graham V, Jones SE, Suwit EA, Moun TE. Double-blind crossover study of the antiemetic efficacy of high-dose dexamethasone versus high-dose metoclopramide. *Journal of Clinical Oncology* 1984; **2**: 466–471.
